# Supplementary material for: Differential profiling of lacrimal cytokines in patients suffering from thyroid-associated orbitopathy
Source: PubMed Central journal article supplement (PMC6050228; doi:10.1038/s41598-018-29113-2), 2018-07-17
Supplement: 41598_2018_29113_MOESM1_ESM.pdf [file 41598_2018_29113_MOESM1_ESM.pdf]

# **Differential profiling of lacrimal cytokines in patients suffering from thyroid-associated orbitopathy**

Edina Kishazi<sup>1</sup>, Marianne Dor<sup>1</sup>, Simone Eperon<sup>2</sup>, Aurélie Oberic<sup>2</sup>, Natacha Turck<sup>1\*</sup>,  
Mehrad Hamedani<sup>2\*</sup>

| Cytokine concentration<br>Mean $\pm$ SD<br>(pg/ml) | Controls (N=18)                  | TAO<br>(N=20)                     | p-value*     |
|----------------------------------------------------|----------------------------------|-----------------------------------|--------------|
| IFN- $\gamma$                                      | 3.43 $\pm$ 11.55                 | 2.38 $\pm$ 5.74                   | 0.627        |
| <b>IL-10</b>                                       | <b>0.43<math>\pm</math>0.94</b>  | <b>4.50<math>\pm</math>10.63</b>  | <b>0.019</b> |
| <b>IL12-p70</b>                                    | <b>0.63<math>\pm</math>0.89</b>  | <b>1.99<math>\pm</math>1.96</b>   | <b>0.009</b> |
| <b>IL-13</b>                                       | <b>0.21<math>\pm</math>0.88</b>  | <b>9.67<math>\pm</math>16.83</b>  | <b>0.020</b> |
| IL-1 $\beta$                                       | 3.43 $\pm$ 4.30                  | 7.68 $\pm$ 14.67                  | 0.204        |
| IL-2                                               | 2.75 $\pm$ 2.32                  | 3.89 $\pm$ 4.68                   | 0.823        |
| IL-4                                               | 0.20 $\pm$ 0.39                  | 0.62 $\pm$ 1.09                   | 0.131        |
| <b>IL-6</b>                                        | <b>6.71<math>\pm</math>18.95</b> | <b>83.17<math>\pm</math>132.0</b> | <b>0.002</b> |
| IL-8                                               | 777.98 $\pm$ 841.55              | 2025.75 $\pm$ 3488.20             | 0.389        |
| <b>TNF-<math>\alpha</math></b>                     | <b>0.46<math>\pm</math>0.80</b>  | <b>2.61<math>\pm</math>3.19</b>   | <b>0.007</b> |
| sIL-6R                                             | 735.29 $\pm$ 1191.56             | 1833.33 $\pm$ 2665.41             | 0.144        |

Supplementary information S1: Cytokine concentrations in tears of TAO and control patients. \*: Mann-Whitney U tests, p-values (bold data highlight significant p-values); SD: standard deviation.

| Cytokine concentration (pg/ml)<br>Mean ± SD | Controls              | CAS<3                  | p-value*     | CAS≥3                  | p-value <sup>†</sup> |
|---------------------------------------------|-----------------------|------------------------|--------------|------------------------|----------------------|
| IFN-γ                                       | 3.43±11.55            | 4.26±7.37              | 0.503        | 1.58±4.99              | 0.935                |
| <b>IL-10</b>                                | <b>0.43±0.94</b>      | <b>2.77±3.88</b>       | <b>0.037</b> | <b>5.24±12.55</b>      | <b>0.028</b>         |
| <b>IL12-p70</b>                             | <b>0.63±0.89</b>      | <b>1.47±0.96</b>       | <b>0.025</b> | <b>2.21±2.26</b>       | <b>0.035</b>         |
| IL-13                                       | 0.21±0.88             | 0±0                    | 0.999        | <b>13.82±18.77</b>     | <b>0.001</b>         |
| IL-1β                                       | 3.43±4.30             | 3.91±3.70              | 0.713        | 9.29±17.32             | 0.227                |
| IL-2                                        | 2.75±2.32             | 3.66±3.05              | 0.494        | 3.99±5.32              | 0.955                |
| IL-4                                        | 0.20±0.39             | 0.47±0.56              | 0.167        | 0.69±1.27              | 0.239                |
| <b>IL-6</b>                                 | 6.71±18.95            | 7.1±14.88              | 0.277        | <b>115.77±146.85</b>   | <b>0.0005</b>        |
| <b>IL-8</b>                                 | <b>777.98±841.55</b>  | <b>561.62±889.50</b>   | <b>0.021</b> | <b>2653.23±4008.19</b> | <b>0.014</b>         |
| <b>TNF-α</b>                                | 0.46±0.80             | 1.01±1.18              | 0.445        | <b>16.92±50.85</b>     | <b>0.002</b>         |
| <b>sIL-6R</b>                               | <b>735.29±1191.56</b> | <b>3291.67±3762.96</b> | <b>0.016</b> | 1104.14±1674.27        | 0.607                |

Supplementary information S2: Cytokine concentrations (pg/ml) in tears of control subjects, patients showing a CAS<3 and those showing a CAS≥ 3. \*: Comparison between tears of control subjects and tears of TAO patients showing a CAS< 3, Mann-Whitney U tests, p-value (bold data highlight significant p-values); <sup>†</sup> comparison between tears of control subjects and tears of patients showing a CAS≥3, Mann-Whitney U tests, p-value (bold data highlight significant p-values).

| Cytokine concentration (pg/ml) mean±SD | TAO                    |                      |              | Control        |                |          |
|----------------------------------------|------------------------|----------------------|--------------|----------------|----------------|----------|
|                                        | Non-smokers            | Smokers              | p-value*     | Non-smokers    | Smokers        | p-value* |
| IFN-γ                                  | 3.64±7.31              | 0.85±2.54            | 0.438        | 5.14±14.02     | 0±0            | 0.838    |
| IL-10                                  | 6.37±14.05             | 2.21±3.30            | 0.864        | 0.61±1.11      | 0.08±0.20      | 0.128    |
| IL12-p70                               | 1.97±1.84              | 2.01±2.22            | 0.839        | 0.74±1.00      | 0.40±0.64      | 0.369    |
| IL-13                                  | 14.6±20.87             | 3.56±7.18            | 0.204        | 0.31±1.08      | 0.00±0.00      | 0.999    |
| IL-1β                                  | 10.98±19.35            | 3.64±3.07            | 0.411        | 3.16±4.43      | 3.98±4.40      | 0.369    |
| IL-2                                   | 4.06±5.82              | 3.69±3.08            | 0.566        | 2.38±2.16      | 3.48±2.67      | 0.615    |
| IL-4                                   | 0.31±0.64              | 1.01±1.42            | 0.054        | 0.25±0.46      | 0.11±0.21      | 0.840    |
| <b>IL-6</b>                            | <b>125.78±165.22</b>   | <b>31.08±72.98</b>   | <b>0.012</b> | 10.07±22.76    | 0.00±0.00      | 0.055    |
| <b>IL-8</b>                            | <b>3138.45±4445.23</b> | <b>665.78±644.04</b> | <b>0.025</b> | 880.14±991.78  | 573.67±410.89  | 0.365    |
| <b>TNF-α</b>                           | <b>20.94±57.23</b>     | <b>1.39±2.27</b>     | <b>0.022</b> | 0.51±0.82      | 0.34±0.83      | 0.323    |
| sIL-6R                                 | 1721.30±2019.85        | 1945.37±3314.94      | 0.910        | 809.72±1324.22 | 694.70±1178.88 | 0.954    |

Supplementary information S3: Cytokine concentrations (pg/ml) in tears of TAO and control patients, each group being divided according to patient smoking status. \*: Mann-Whitney p-values (bold data highlight significant p-values); SD: Standard Deviation.

| Cytokine concentration (pg/ml) mean±SD | Non-smokers            |                      |                   | Smokers          |                  |              |
|----------------------------------------|------------------------|----------------------|-------------------|------------------|------------------|--------------|
|                                        | TAO                    | Control              | p-value*          | TAO              | Control          | p-value*     |
| <b>IFN-γ</b>                           | 3.64±7.31              | 5.14±14.02           | 0.353             | 0.85±2.54        | 0±0              | 0.843        |
| <b>IL-10</b>                           | <b>6.37±14.05</b>      | <b>0.61±1.11</b>     | <b>0.012</b>      | 2.21±3.30        | 0.08±0.20        | 0.191        |
| <b>IL-12p70</b>                        | <b>1.97±1.84</b>       | <b>0.74±1.00</b>     | <b>0.019</b>      | 2.01±2.22        | 0.40±0.64        | 0.056        |
| <b>IL-13</b>                           | <b>14.6±20.87</b>      | <b>0.31±1.08</b>     | <b>0.004</b>      | 3.56±7.18        | 0.00±0.00        | 0.103        |
| <b>IL-1β</b>                           | 10.98±19.35            | 3.16±4.43            | 0.120             | 3.64±3.07        | 3.98±4.40        | 0.669        |
| <b>IL-2</b>                            | 4.06±5.82              | 2.38±2.16            | 0.851             | 3.69±3.08        | 3.48±2.67        | 0.502        |
| <b>IL-4</b>                            | 0.31±0.64              | 0.25±0.46            | 0.804             | <b>1.01±1.42</b> | <b>0.11±0.21</b> | <b>0.016</b> |
| <b>IL-6</b>                            | <b>125.78±165.22</b>   | <b>10.07±22.76</b>   | <b>&lt;0.0001</b> | 31.08±72.98      | 0.00±0.00        | 0.315        |
| <b>IL-8</b>                            | <b>3138.45±4445.23</b> | <b>880.14±991.78</b> | <b>0.031</b>      | 665.78±644.04    | 573.67±410.89    | 0.364        |
| <b>TNF-α</b>                           | <b>20.94±57.23</b>     | <b>0.51±0.82</b>     | <b>0.0003</b>     | 1.39±2.27        | 0.34±0.83        | 0.484        |
| <b>sIL-6R</b>                          | 1721.30±2019.85        | 694.70±1178.88       | 0.236             | 1945.37±3314.94  | 809.72±1324.22   | 0.225        |

Supplementary information S4: Cytokine concentrations (pg/ml) in tears of non-smokers on one side and smokers on the other side. \*: In each group, values are compared between TAO patients and controls. Mann-Whitney p-values (bold data highlight significant p-values); SD: Standard Deviation.
